# Supplementary material
Source: PubMed Central journal article supplement (PMC4576027)
Supplement: AAC.00482-15_zac010154463so1.pdf [file AAC.00482-15_zac010154463so1.pdf]

## **Supplemental Information**

The main text describes the results of different dihydroartemisinin-piperaquine (DHA-PPQ) dosing regimens assuming the ratio of DHA to PPQ matches the World Health Organization (WHO) recommended ratio of 1:4.5 (1). The predicted cure rates and parasite clearance times for each model calibration can be found in Table S1.

Here we show the results are consistent when simulating the DHA to PPQ ratio of 1:8 (2); typical of the commercially available co-formulations routinely used as first-line therapies. The commercial dosing regimens tested are described in Table S2 and the corresponding treatment outcomes are given in Table S3 and Figure S1.

## References

1. **World Health Organization.** 2010. Guidelines for the treatment of malaria – 2<sup>nd</sup> edition, 2nd ed. World Health Organization, Geneva.
2. **Sigma-Tau Industrie Farmaceutiche Riunite s.p.a.** 2011. Eurartesim Product Information. EMEA/H/C/001199 -II/0001/G. [http://www.ema.europa.eu/docs/en\\_GB/.../001199/WC500118117.pdf](http://www.ema.europa.eu/docs/en_GB/.../001199/WC500118117.pdf).
3. **Winter K, Hastings IM.** 2011. Development, evaluation, and application of an *in silico* model for antimalarial drug treatment and failure. *Antimicrob Agents Chemother* **55**:3380-3392.
4. **Hodel EMS, Guidi M, Zanolari B, Mercier T, Duong S, Kabanywanyi AM, Ariey F, Buclin T, Beck H-P, Decosterd LA, Olliaro P, Genton B, Csajka C.** 2013. Population pharmacokinetics of mefloquine, piperazine and artemether-lumefantrine in Cambodian and Tanzanian malaria patients. *Malar J* **12**.
5. **Tarning J, Ashley EA, Lindegardh N, Stepniewska K, Phaiphun L, Day NPJ, McGready R, Ashton M, Nosten F, White NJ.** 2008. Population pharmacokinetics of piperazine after two different treatment regimens with dihydroartemisinin piperazine in patients with *Plasmodium falciparum* malaria in Thailand. *Antimicrob Agents Chemother* **52**:1052-1061.
6. **Hung T, Davis T, Ilett K, Karunajeewa H, Hewitt S, Denis M, Lim C, Socheat D.** 2004. Population pharmacokinetics of piperazine in adults and children with uncomplicated falciparum or vivax malaria. *Br J Clin Pharmacol* **57**:253-262.
7. **Tarning J, Rijken MJ, McGready R, Phyo AP, Hanpithakpong W, Day NP, White NJ, Nosten F, Lindegardh N.** 2012. Population pharmacokinetics of dihydroartemisinin and piperazine in pregnant and nonpregnant women with uncomplicated malaria. *Antimicrob Agents Chemother* **56**:1997-2007.
8. **Tarning J, Zongo I, Some FA, Rouamba N, Parikh S, Rosenthal PJ, Hanpithakpong W, Jongrak N, Day NP, White NJ, Nosten F, Ouedraogo JB, Lindegardh N.** 2012. Population pharmacokinetics and pharmacodynamics of piperazine in children with uncomplicated falciparum malaria. *Clin Pharmacol Ther* **91**:497-505.

9. **Hoglund R, Adam I, Hanpithakpong W, Ashton M, Lindegardh N, Day N, White N, Nosten F, Tarning J.** 2012. A population pharmacokinetic model of piperaquine in pregnant and non-pregnant women with uncomplicated *Plasmodium falciparum* malaria in Sudan. *Malaria Journal* **11**:398.

**Table S1. Predicted cure rate and parasite clearance times following five dosing regimens, and a poor adherence scenario, of dihydroartemisinin-piperaquine (DHA-PPQ).** The regimens are described in the main text and summarised on Table 1. Cure rates were simulated using either one-compartment (calibration 1), two-compartment (calibration 2a-c) or three-compartment (calibration 3a-c) PK models as explained in the main text and in the caption to Figure 1.

|                           | SR <sub>3/3</sub> | eSTD <sub>5/5</sub> | pa[eSTD <sub>5/5</sub> ] | eITD <sub>5/5</sub> | sSTD <sub>6/3</sub> | sITD <sub>6/3</sub> |
|---------------------------|-------------------|---------------------|--------------------------|---------------------|---------------------|---------------------|
| <b>Calibration 1 (3)</b>  |                   |                     |                          |                     |                     |                     |
| TCR (%)                   | 98.0              | 99.4                | 92.8                     | 99.7                | 99.7                | 99.9                |
| ACR (%) day 28            | 99.4              | 99.8                | 96.3                     | 99.9                | 99.9                | 100.0               |
| ACR (%) day 42            | 99.0              | 99.6                | 94.1                     | 99.9                | 99.8                | 100.0               |
| ACR (%) day 63            | 98.3              | 99.4                | 93.1                     | 99.8                | 99.7                | 99.9                |
| PCT (days)                | 0.9               | 1.1                 | 1.1                      | 0.9                 | 0.9                 | 0.7                 |
| (mean (min, max))         | (0.5, 11)         | (0.5, 9)            | (0.5, 17)                | (0.5, 21)           | (0.5, 26)           | (0.5, 13)           |
| <b>Calibration 2a (4)</b> |                   |                     |                          |                     |                     |                     |
| TCR (%)                   | 64.9              | 83.3                | 41.3                     | 93.8                | 90.8                | 97.8                |
| ACR (%) day 28            | 66.8              | 84.4                | 42.1                     | 94.6                | 91.4                | 98.1                |
| ACR (%) day 42            | 65.1              | 83.5                | 41.4                     | 94.0                | 90.9                | 97.9                |
| ACR (%) day 63            | 64.9              | 83.4                | 41.3                     | 93.8                | 90.8                | 97.8                |
| PCT (days)                | 1.1               | 1.3                 | 1.2                      | 1.1                 | 0.9                 | 0.8                 |
| (mean (min, max))         | (0.5, 16)         | (0.5, 11)           | (0.5, 7)                 | (0.5, 8)            | (0.5, 8.0)          | (0.5, 8.0)          |
| <b>Calibration 2b (5)</b> |                   |                     |                          |                     |                     |                     |
| TCR (%)                   | 67.5              | 86.0                | 46.4                     | 94.7                | 92.0                | 97.7                |
| ACR (%) day 28            | 68.1              | 86.3                | 46.5                     | 95.1                | 92.1                | 98.1                |
| ACR (%) day 42            | 67.5              | 86.1                | 46.4                     | 94.8                | 92.0                | 97.8                |
| ACR (%) day 63            | 67.5              | 86.0                | 46.4                     | 94.7                | 92.0                | 97.8                |
| PCT (days)                | 1.0               | 1.2                 | 1.1                      | 1.0                 | 0.9                 | 0.8                 |
| (mean (min, max))         | (0.5, 7)          | (0.5, 5)            | (0.5, 8)                 | (0.5, 5)            | (0.5, 3.5)          | (0.5, 3.0)          |
| <b>Calibration 2c (6)</b> |                   |                     |                          |                     |                     |                     |
| TCR (%)                   | 74.4              | 90.1                | 58.2                     | 96.1                | 94.4                | 98.2                |
| ACR (%) day 28            | 75.6              | 90.4                | 59.0                     | 96.4                | 94.6                | 98.4                |
| ACR (%) day 42            | 74.7              | 90.2                | 58.3                     | 96.1                | 94.5                | 98.3                |
| ACR (%) day 63            | 74.5              | 90.1                | 58.2                     | 96.1                | 94.4                | 98.2                |
| PCT (days)                | 0.9               | 1.1                 | 1.0                      | 0.9                 | 0.8                 | 0.7                 |
| (mean (min, max))         | (0.5, 6)          | (0.5, 5.5)          | (0.5, 7.0)               | (0.5, 5.5)          | (0.5, 5.5)          | (0.5, 4.5)          |

*Continued on following page*

**Table S1. – Continued**

|                                 | SR <sub>3/3</sub> | eSTD <sub>5/5</sub> | pa[eSTD <sub>5/5</sub> ] | eITD <sub>5/5</sub> | sSTD <sub>6/3</sub> | sITD <sub>6/3</sub> |
|---------------------------------|-------------------|---------------------|--------------------------|---------------------|---------------------|---------------------|
| <b>Calibration 3a (7)</b>       |                   |                     |                          |                     |                     |                     |
| TCR (%)                         | 79.0              | 92.0                | 57.3                     | 97.9                | 95.5                | 99.1                |
| ACR (%) day 28                  | 80.5              | 92.8                | 58.4                     | 98.4                | 96.0                | 99.3                |
| ACR (%) day 42                  | 79.4              | 92.1                | 57.5                     | 98.1                | 95.6                | 99.2                |
| ACR (%) day 63                  | 79.1              | 92.0                | 57.3                     | 97.9                | 95.5                | 99.1                |
| PCT (days)<br>(mean (min, max)) | 0.9<br>(0.5, 5.5) | 1.1<br>(0.5, 5.5)   | 1.1<br>(0.5, 7.0)        | 0.9<br>(0.5, 5.0)   | 0.9<br>(0.5, 4.5)   | 0.7<br>(0.5, 3.0)   |
| <b>Calibration 3b (8)</b>       |                   |                     |                          |                     |                     |                     |
| TCR (%)                         | 96.3              | 99.1                | 91.6                     | 99.5                | 99.3                | 99.7                |
| ACR (%) day 28                  | 97.8              | 99.5                | 93.4                     | 99.8                | 99.5                | 99.9                |
| ACR (%) day 42                  | 97.0              | 99.2                | 92.1                     | 99.7                | 99.4                | 99.8                |
| ACR (%) day 63                  | 96.5              | 99.1                | 91.7                     | 99.5                | 99.3                | 99.8                |
| PCT (days)<br>(mean (min, max)) | 0.8<br>(0.5, 5.0) | 0.9<br>(0.5, 11)    | 0.9<br>(0.5, 6.0)        | 0.8<br>(0.5, 9.0)   | 0.8<br>(0.5, 9.0)   | 0.7<br>(0.5, 6.0)   |
| <b>Calibration 3c (9)</b>       |                   |                     |                          |                     |                     |                     |
| TCR (%)                         | 91.3              | 96.8                | 73.0                     | 99.3                | 98.2                | 99.7                |
| ACR (%) day 28                  | 93.8              | 97.8                | 75.6                     | 99.7                | 98.8                | 99.9                |
| ACR (%) day 42                  | 91.8              | 96.9                | 73.3                     | 99.4                | 98.3                | 99.8                |
| ACR (%) day 63                  | 91.4              | 96.8                | 73.0                     | 99.3                | 98.2                | 99.7                |
| PCT (days)<br>(mean (min, max)) | 0.9<br>(0.5, 9.0) | 1.1<br>(0.5, 10)    | 1.1<br>(0.5, 7.0)        | 0.9<br>(0.5, 7.0)   | 0.9<br>(0.5, 8.0)   | 0.7<br>(0.5, 7.0)   |

TCR: true cure rate (i.e. parasite number <1); ACR: apparent cure rate (i.e. parasite number <10<sup>8</sup>);

PCT: parasite clearance time; SR<sub>3/3</sub>: standard regimen; eSTD<sub>5/5</sub>: extended regimen; pa[eSTD<sub>5/5</sub>]: extended regimen with poor adherence; eITD<sub>5/5</sub>: increased and extended regimen; sSTD<sub>6/3</sub>: split standard regimen; sITD<sub>6/3</sub>: twice daily standard regimen.

**Table S2. Dosing regimens, and a poor adherence scenario, for dihydroartemisinin-piperaquine (DHA-PPQ) using commercial co-formulations of the drug.** This table has the same format as Table 1 of the main text which presented the analogous results for treatment with the World Health Organization’s (WHO) recommended ratio of DHA:PPQ. The commercial co-formulations of DHA-PPQ contain less DHA than recommend by WHO so the DHA doses shown here are consistently lower than those given on Table 1 of the main text.

| Regimen *                                                             | Dosing interval                                     | Single dose<br>DHA/PPQ<br>[mg/kg] | Total dose<br>DHA/PPQ<br>[mg/kg] |
|-----------------------------------------------------------------------|-----------------------------------------------------|-----------------------------------|----------------------------------|
| SR <sub>3/3</sub><br>(Standard regimen)                               | Once daily for three days                           | 2/18                              | 6/54                             |
| eSTD <sub>5/5</sub><br>(Extended regimen)                             | Once daily for five days                            | 1.2/10.8                          | 6/54                             |
| pa[eSTD <sub>5/5</sub> ]<br>(eSTD <sub>5/5</sub> with poor adherence) | Once daily for three days<br>(doses 4 and 5 missed) | 1.2/10.8                          | 3.6/32.4                         |
| eITD <sub>5/5</sub><br>(Increased and extended regimen)               | Once daily for five days                            | 2/18                              | 10/90                            |
| sSTD <sub>6/3</sub><br>(Split SR <sub>3/3</sub> )                     | Twice daily for three days                          | 1/9                               | 6/54                             |
| sITD <sub>6/3</sub><br>(Twice SR <sub>3/3</sub> )                     | Twice daily for three days                          | 2/18                              | 12/108                           |

\* The ratio of DHA-PPQ in the combination is 1:8 and corresponds to the ratio of the commercially available fix-dose combination.

**Table S3. Predicted cure rate and parasite clearance times following six different dosing regimens of dihydroartemisinin-piperazine (DHA-PPQ) using commercial co-formulations of the drug.** This table has the same format as Table S1 which presented the analogous results for treatment with the World Health Organization's recommended ratio of DHA:PPQ. The regimens are described in Table S2. Cure rates were simulated using either one-compartment (calibration 1), two-compartment (calibration 2a-c) or three-compartment (calibration 3a-c) pharmacokinetic models (see main text).

|                           | SR <sub>3/3</sub> | eSTD <sub>5/5</sub> | pa[eSTD <sub>5/5</sub> ] | eITD <sub>5/5</sub> | sSTD <sub>6/3</sub> | sITD <sub>6/3</sub> |
|---------------------------|-------------------|---------------------|--------------------------|---------------------|---------------------|---------------------|
| <b>Calibration 1 (3)</b>  |                   |                     |                          |                     |                     |                     |
| TCR (%)                   | 97.4              | 98.9                | 90.9                     | 99.6                | 99.4                | 99.8                |
| ACR (%) day 28            | 99.3              | 99.7                | 95.5                     | 99.9                | 99.8                | 99.9                |
| ACR (%) day 42            | 98.5              | 99.5                | 92.5                     | 99.8                | 99.7                | 99.9                |
| ACR (%) day 63            | 97.8              | 99.1                | 91.2                     | 99.7                | 99.5                | 99.9                |
| PCT (days)                | 1.0               | 1.2                 | 1.3                      | 1.0                 | 0.9                 | 0.8                 |
| (mean (min, max))         | (0.5, 13)         | (0.5, 12)           | (0.5, 20)                | (0.5, 25)           | (0.5, 8.0)          | (0.5, 18)           |
| <b>Calibration 2a (4)</b> |                   |                     |                          |                     |                     |                     |
| TCR (%)                   | 57.3              | 76.7                | 32.4                     | 91.1                | 85.7                | 96.9                |
| ACR (%) day 28            | 59.5              | 78.0                | 33.5                     | 92.4                | 86.6                | 97.3                |
| ACR (%) day 42            | 57.5              | 76.9                | 32.5                     | 91.3                | 85.9                | 97.0                |
| ACR (%) day 63            | 57.3              | 76.8                | 32.4                     | 91.1                | 85.7                | 96.9                |
| PCT (days)                | 1.2               | 1.5                 | 1.3                      | 1.3                 | 1.0                 | 0.9                 |
| (mean (min, max))         | (0.5, 19)         | (0.5, 13)           | (0.5, 7.0)               | (0.5, 9)            | (0.5, 10)           | (0.5, 9)            |
| <b>Calibration 2b (5)</b> |                   |                     |                          |                     |                     |                     |
| TCR (%)                   | 58.1              | 79.6                | 36.9                     | 92.2                | 87.7                | 96.2                |
| ACR (%) day 28            | 58.9              | 80.1                | 37.0                     | 92.8                | 88.0                | 96.7                |
| ACR (%) day 42            | 58.2              | 79.7                | 36.9                     | 92.3                | 87.8                | 96.2                |
| ACR (%) day 63            | 58.2              | 79.7                | 36.9                     | 92.2                | 87.8                | 96.2                |
| PCT (days)                | 1.1               | 1.4                 | 1.3                      | 1.1                 | 1.0                 | 0.8                 |
| (mean (min, max))         | (0.5, 8)          | (0.5, 5.5)          | (0.5, 8)                 | (0.5, 6)            | (0.5, 4.5)          | (0.5, 4.0)          |
| <b>Calibration 2c (6)</b> |                   |                     |                          |                     |                     |                     |
| TCR (%)                   | 67.1              | 85.6                | 49.1                     | 93.8                | 91.0                | 97.2                |
| ACR (%) day 28            | 68.8              | 86.2                | 50.2                     | 94.2                | 91.4                | 97.5                |
| ACR (%) day 42            | 67.5              | 85.7                | 49.3                     | 93.9                | 91.0                | 97.2                |
| ACR (%) day 63            | 67.2              | 85.6                | 49.2                     | 93.8                | 91.0                | 97.2                |
| PCT (days)                | 1.0               | 1.2                 | 1.2                      | 1.0                 | 0.9                 | 0.8                 |
| (mean (min, max))         | (0.5, 6)          | (0.5, 5.5)          | (0.5, 11)                | (0.5, 5.5)          | (0.5, 5.5)          | (0.5, 4.5)          |

*Continued on following page*

**Table S3.** – *Continued*

|                           | SR <sub>3/3</sub> | eSTD <sub>5/5</sub> | pa[eSTD <sub>5/5</sub> ] | eITD <sub>5/5</sub> | sSTD <sub>6/3</sub> | sITD <sub>6/3</sub> |
|---------------------------|-------------------|---------------------|--------------------------|---------------------|---------------------|---------------------|
| <b>Calibration 3a (7)</b> |                   |                     |                          |                     |                     |                     |
| TCR (%)                   | 72.3              | 88.0                | 47.2                     | 96.7                | 92.2                | 98.7                |
| ACR (%) day 28            | 74.5              | 89.1                | 48.5                     | 97.5                | 92.9                | 99.1                |
| ACR (%) day 42            | 72.8              | 88.2                | 47.5                     | 96.9                | 92.3                | 98.8                |
| ACR (%) day 63            | 72.4              | 88.1                | 47.2                     | 96.7                | 92.2                | 98.7                |
| PCT (days)                | 1.1               | 1.3                 | 1.2                      | 1.1                 | 1.0                 | 0.8                 |
| (mean (min, max))         | (0.5, 15)         | (0.5, 6.0)          | (0.5, 7.0)               | (0.5, 12)           | (0.5, 5.0)          | (0.5, 3.5)          |
| <b>Calibration 3b (8)</b> |                   |                     |                          |                     |                     |                     |
| TCR (%)                   | 95.0              | 98.6                | 88.2                     | 99.3                | 98.9                | 99.5                |
| ACR (%) day 28            | 97.1              | 99.3                | 91.0                     | 99.7                | 99.4                | 99.8                |
| ACR (%) day 42            | 95.9              | 98.9                | 89.0                     | 99.6                | 99.1                | 99.7                |
| ACR (%) day 63            | 95.3              | 98.7                | 88.5                     | 99.4                | 99.0                | 99.6                |
| PCT (days)                | 0.9               | 1.1                 | 1.1                      | 0.9                 | 0.9                 | 0.8                 |
| (mean (min, max))         | (0.5, 15)         | (0.5, 4.5)          | (0.5, 13)                | (0.5, 10)           | (0.5, 11)           | (0.5, 8.0)          |
| <b>Calibration 3c (9)</b> |                   |                     |                          |                     |                     |                     |
| TCR (%)                   | 88.3              | 95.4                | 66.1                     | 98.9                | 96.9                | 99.5                |
| ACR (%) day 28            | 91.6              | 96.8                | 69.4                     | 99.6                | 97.9                | 99.8                |
| ACR (%) day 42            | 88.7              | 95.6                | 66.5                     | 99.1                | 97.0                | 99.6                |
| ACR (%) day 63            | 88.3              | 95.4                | 66.2                     | 98.9                | 96.9                | 99.5                |
| PCT (days)                | 1.1               | 1.3                 | 1.3                      | 1.1                 | 1.0                 | 0.8                 |
| (mean (min, max))         | (0.5, 10)         | (0.5, 11)           | (0.5, 11)                | (0.5, 7)            | (0.5, 8.0)          | (0.5, 7.0)          |

TCR: true cure rate (i.e. parasite number <1); ACR: apparent cure rate (i.e. parasite number <10<sup>8</sup>);

PCT: parasite clearance time; SR<sub>3/3</sub>: standard regimen; eSTD<sub>5/5</sub>: extended regimen; pa[eSTD<sub>5/5</sub>]:

extended regimen with poor adherence; eITD<sub>5/5</sub>: increased and extended regimen; sSTD<sub>6/3</sub>: split

standard regimen; sITD<sub>6/3</sub>: twice daily standard regimen.



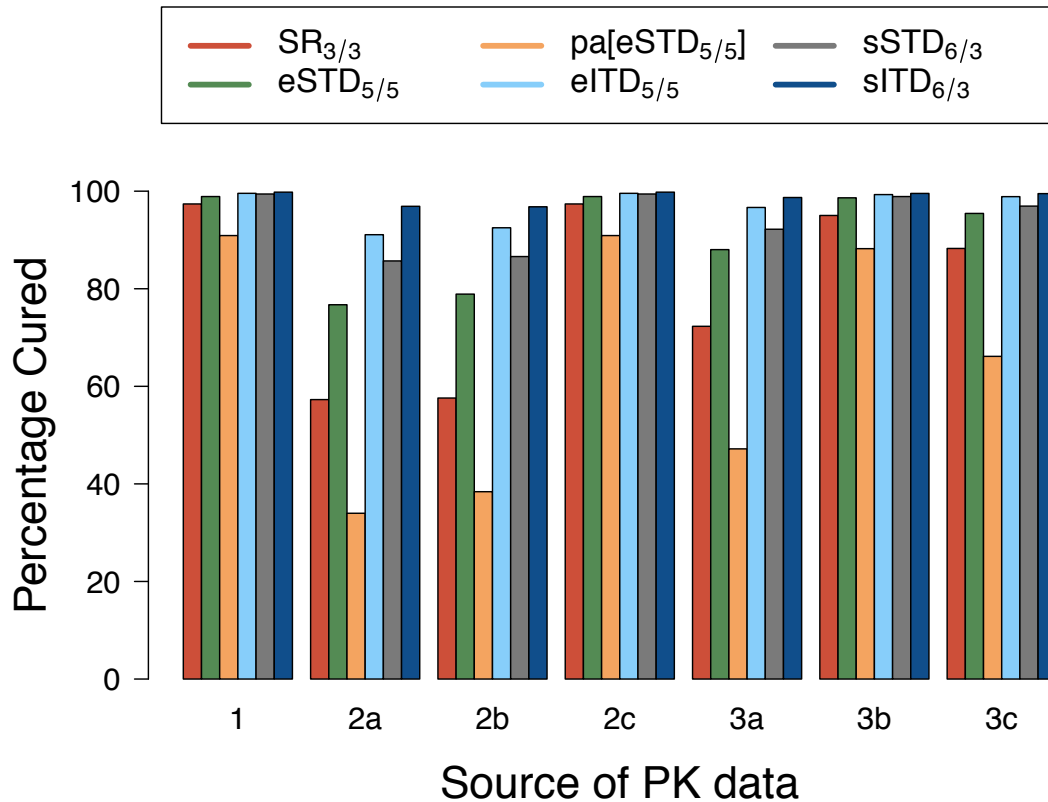

**Figure S1. The percentage of individuals predicted to be cured by five dihydroartemisinin-piperavaquine (DHA-PPQ) dosing regimens and one poor adherence scenario.** This figure has the same format as Figure 1 of the main text which presented the analogous results for treatment with the World Health Organization’s recommended ratio of DHA:PPQ. Cure rates were estimated across seven different pharmacokinetic (PK) calibrations for PPQ. The regimens and poor adherence scenario are detailed in Table S2. The PK calibrations are as follows (see main text for more details). Calibration 1 is the one-compartment PK model described in (3). Calibrations 2a-c are two-compartment models calibrated using data from (4-6) respectively. Calibration 3a-c are three-compartment models calibrated using data from (7-9) respectively.
